# Supplementary material
Source: publisher site journal article supplement (https://www.spandidos-publications.com/3237/downloadSupplementary)
Supplement: Supplementary file 1 [file downloadSupplementary]

Figure S1. Photographs of colon cancer cases in microarray analysis. (A) The gross photographs. (B) The microscopy photographs of surgical specimens stained with hematoxylin and eosin (x100 magnification).

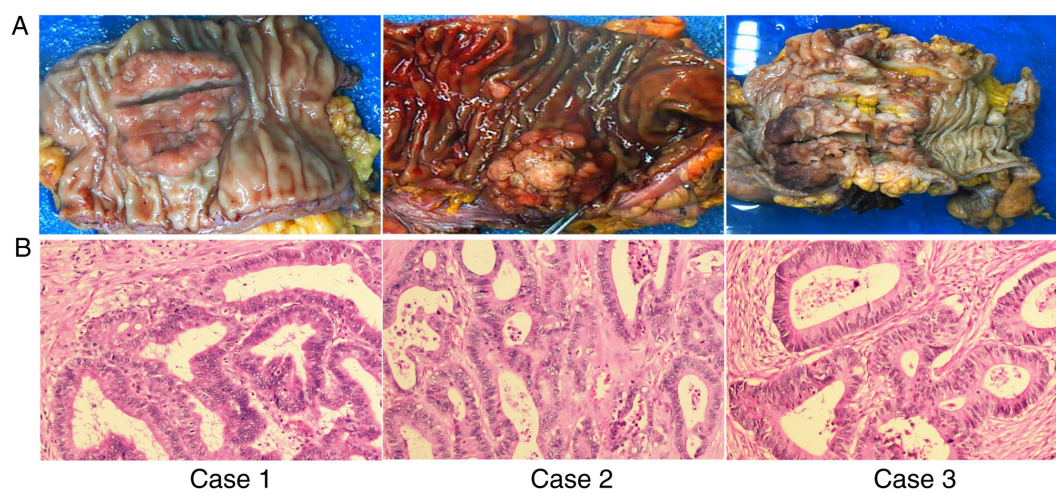

Table SI. Clinicopathological characteristics of three colon cancer cases in the microarray analysis.

| Case   | Age, years | Sex  | Depth of invasion | Tumor grade | Lymph node metastasis | Distant metastasis | TNM stage |
|--------|------------|------|-------------------|-------------|-----------------------|--------------------|-----------|
| Case 1 | 62         | Male | T3                | MD          | N0                    | M0                 | IIA       |
| Case 2 | 62         | Male | T3                | MD          | N0                    | M0                 | IIA       |
| Case 3 | 64         | Male | T3                | MD          | N0                    | M0                 | IIA       |

MD, moderate differentiation; TNM, Tumor-Node-Metastasis.
